# Supplementary material
Source: publisher site journal article supplement (https://www.dovepress.com/article/465209)
Supplement: Supplementary file 1 [file get_supplementary_file.php]

**Encouraging Breastfeeding Without Guilt: A Qualitative Study of Breastfeeding Promotion in the Singapore Healthcare Setting**

SUPPLEMENTARY FILE 1/1 - Codebook

| **Theme** | **Sub-theme** | **Example Quotation(s)** |
| --- | --- | --- |
| **Sources of breastfeeding information** | | | |
| Official sources | Antenatal classes | “I tell you, only 20% attend… ‘Oh, I'm too busy to go.’ Then you should be too busy to have a baby.” Lactation Consultant  “I always refer them for antenatal classes if they have not joined.” Doctor (Women’s health)  “I attended the prenatal classes at the hospital, there were brochures.” Mother (Breastfeeding) |
| Official websites & resources | “For our patients who deliver in the hospital, we have actually a breastfeeding booklet that is quite all-encompassing.” Pediatrician  “There are [local] resources available… I think a lot of them ]mothers] actually didn't realize about that… Our marketing strategy not good enough.” Researcher |
| Informal sources | Internet search | “Actually I just googled.” Mother (Breastfeeding)  “I read a lot of things online by other mothers and all that… I used to have this app called BabyCenter. It's also a pregnancy app, a pregnancy and an infant app.” Mother (Formula feeding) |
| Social media | “I think it's really important to take it all with a pinch of salt because whatever works for somebody else may not work for you, right?” Mother (Formula feeding)  “There's a lot of EDD [Estimated Due Date] Whatsapp group for mothers… My estate has a mummies group as well.” Mother (Breastfeeding) |
| Official peer support | “the BMSG Facebook group. I think that's a pretty public one. I've been reading through and also posting questions over there to get inputs and also to clarify a couple of things.” Mother (Formula feeding)  “Breastfeeding Moms on Facebook or something. I will always go there, and see, and read people have got what problem. Sometimes I post there I have a problem then a lot of mummies will come in and help.” Mother (Formula feeding) |
| Family and friends | “Their mother also gave them formula milk. They say, "There's nothing wrong with me. I don't see a need that I need to go through all this pumping and all that.” Nurse  “I came to my friends, some of my friends for their experience.” Mother (Formula feeding) |
| **Factors that affect how breastfeeding is perceived** | | | |
| Intention and knowledge | Success requires strong initiative | “if they are enlightened enough, hardworking enough, enthusiastic enough to educate themselves, then they will make it a point to read, they will make it a point to go to the library, they will make it a point to ask their peers.” Lactation Consultant  “You just have tenacity and doggedness, and work at very odd hours on very little sleep… Again, I think more of my professional training, guts, determination and surviving on very little sleep and really horrible, like work.” Mother (Breastfeeding) |
| Most intend to breastfeed | “I must say that there are very few moms who from the outset will say, ‘I don't want to try at all.’” Pediatrician  “Very rarely we come across just purely formula feeding, unless the babies are older and they've run out of supply.” General Practitioner |
| Knowledge of benefits to child | “They [guidelines] said I had to breastfeed my kid up till one year old, so yes, we just followed.” Mother (Breastfeeding)  “I think mommy's milk will be better, even though I'm unable to tell you what is better.” Mother (Breastfeeding)  “Breastmilk provides antibodies… so they will have a lot of immunization that are needed for small babies.” Mother (Formula feeding) |
| Knowledge of maternal benefits | “…we get to lose weight. I think that's very beneficial for the mommy.” Mother (Breastfeeding)  “Less chance of having breast cancer. I think we can slim down faster.” Mother (Formula feeding) |
| Knowledge of required milk supply | “They expect as soon as the baby be delivered, milk will flow, which obviously is not true.” Doctor (Women’s health)  “A lot of the moms… after they deliver, they will complain that they don't have enough milk to feed the child. Then, they are hoping that they supplement for the first couple of weeks, and then things will get better, but it never does.” Researcher  “Especially, I say the Asian culture, if let's say that you give formula-fed, usually, the baby will look chubbier, they think it is healthier.” Researcher  “I got the feeling that he is still a bit hungry and maybe I’m not providing enough. I started to just top up a little bit of the formula milk.” Mother (Formula feeding) |
| Mental wellbeing | Too much pressure will backfire | “Probably it [breastmilk] is the best, it has antibodies and everything. But if you don't have and you go into depression, I think you cannot produce milk as well.” Mother (Formula feeding)  “Most… important is that our baby is fed in general, and it should not be too stressful to choose either one because we also do not want to make our life more difficult.” Mother (Formula feeding) |
| Anxiety in first-time moms | “I think those that are first-time mothers obviously are very anxious. They want to know a lot of things about pregnancy. Usually, the discussion about breastfeeding and all that comes on probably towards the later part of the pregnancy nearer delivery...” Doctor (Women’s health)  “First one was really a very bad experience, may be due to not having enough experience.” Mother (Breastfeeding) |
| Physically challenging | “Because my baby had difficulty latching, so we didn't know exactly how much she was drinking and she was crying, so we supplemented after latching.” Mother (Formula feeding)  “I really don't know how to latch at that point in time. It's a lot of trial and error… for the first three weeks to one month, I could've been almost crying at every feeding session because it's damn painful.” Mother (Breastfeeding) |
| Mentally challenging | “Everyone mentioned that breastfeeding is really a tough part, the steepest of the learning curve.” Mother (Formula feeding)  “…the whole routine of latching and then pumping and then latching and pumping really takes a lot of time and toll on physical health, and also sometimes mental health.” Mother (Formula feeding) |
| Birth complication | “Those preterm moms, those with medical issues and [who] have to stay in hospital for complications, these are the mothers who tend to not succeed so well.” Doctor (Women’s health) |
| Previous bad experience or trauma | “…we also have a fair number who didn't have very good experiences with breastfeeding. Those are the ones that probably require a little bit more help and a bit more talking to about thinking of doing breastfeeding again this time.” Doctor (Women’s health)  “Maybe traumatized by the first breastfeeding. Number two could be traumatized during childhood. She herself actually [had] been at some time, unfortunately, traumatized in a way or another. That is forever lasting, mentally is unable to get rid of and is uncomfortable about it.” Lactation Consultant |
| Reality versus expectation | “They think they do not need to prepare for breastfeeding especially knowledge-wise. They feel that the moment the baby comes out, and then the baby will latch on to the breast and then happy ending.” Lactation Consultant  “…they give up because they did not expect it to be so exhausting.” Researcher  “Thinking that as a first time mother, it is a very easy thing to do. Obviously, as what I found out, when we have the baby, it is actually not that easy.” Mother (Formula feeding) |
| Influence from household members | Mixed views on husbands | “I met one husband now, all he thought about his role as a father and husband is to give money.” Lactation Consultant  “All the hubby in my antenatal classes are usually very good husbands, fantastic, because they're mentally [prepared], and have the knowledge to understand how to support. A lot of men mean to support but they don't know how to support.” Lactation Consultant  “…my husband doesn't really care, for him, he just felt that my mental state was more important. Because it was so difficult for me, so even in the second week he said 'why can't you just switch to formula.’” Mother (Formula feeding)  “My husband will take care of the [older] kids so that I can pump.” Mother (Formula feeding) |
| Family & friends important | “Oh, it's a whole village. Everyone, husband, employer, friends, obstetric care, to be sensitive and women-centric.” Doctor (Women’s health)  “The other family members can do things that the mom cannot do… washing the bottles, pump parts, preparing meals, can be outsourced, then that will ease a lot of burden off the shoulders for the mom.” Mother (Breastfeeding) |
| Older family oppose breastfeeding | “If they're not supportive, like a lot of the old fashioned mother-in-laws who were themselves brought up on formula, they don't see the advantage of breastfeeding so they don't encourage them very much.” Doctor (Women’s health)  “My parents were extremely anti-breastfeeding. I just ignored them... If you want to breastfeed you just have to have the ability to ignore all these people.” Mother (Breastfeeding)  “There are people who had their breastmilk being thrown away by their parents or their in-laws. They believe formula is better.” Mother (Breastfeeding) |
| Confinement nannies | “Younger people are still using confinement women, confinement nannies, who I think are another hindrance to breastfeeding. They don't encourage it very much.” Doctor (Women’s health)  “I learned to feed using formula through the confinement nanny.” Mother (Breastfeeding) |
| Influence from workplace and society | Lack of support from workplace | “Some of them is the bosses that doesn't allow extended time off work just to pump. A one-hour lunch break means one-hour lunch break, nothing else. You either sacrifice your lunch break to pump or you don't pump.” Mother (Breastfeeding)  “When they see you expressing your milk there, then the general impression is ‘Okay when she pumps, it means that she's not working.’” Mother (Breastfeeding)  “We have a nursing room, but I'm too busy to pump. My job requires me to be on a specific timetable.” Mother (Formula feeding) |
| Lack of support from society | “I don't think I dare to latch my baby on the MRT train and all that, because it's not our culture… People are not very used to seeing mothers breastfeed in public places.” Mother (Formula feeding)  “increasingly more malls are having nursing rooms, which is good. Unfortunately, there's huge misuse and abuse… They just treat it as an R&R place.” Mother (Breastfeeding)  “…if I breastfeed in a food court or something like that, yes, then people will just stare for a while… When I go to the nursing room I still use the nursing cover and then there are some people who still come in to refill water, so irritating.” Mother (Breastfeeding) |
| Hospital health workers | Mixed presentation of infant feeding options | “It (breastfeeding) was like the norm for all of them (hospital staff), that everyone had to, all mothers will just breastfeed. So they didn't really even ask, they just bring the baby to you, bring the baby to your nipple and then start to feed.” Mother (Formula feeding)  “In fact, before I give birth they already asked (when processing the admission for delivery), "Do you intend to breast feed, or do you intend to feed formula or whatnot…They make it sound as if breastfeeding is optional kind of thing...’” Mother (Breastfeeding)  “They (hospital staff) offer the formula, I would say quite willingly…if they insist more, they make me aware more or recall more about the importance of breastfeeding, who knows, maybe I still end up the same…(or) It might be slightly different…A woman when they deliver, they're so overwhelmed. If the nurse and the hospital can help, maybe it's not their role, but if they can help to constantly remind mothers that "Oh, breastfeed is very important, please try. Milk formula should be only the last resort”, and maybe don't give so early…I think here in Singapore, yes, you ask for formula, it is given.” Mother (Formula feeding) |
|  | Mixed experiences of assurance and overwelming | “So the nurses were like, guiding you to check the hunger cues and other stuff like observe the latching. So I think when I brought her home, it was very easy for me to tell whether she was sleeping or nursing, like sucking on a nipple, if she's really drinking. So that helped a lot.” Mother (Breastfeeding)  “The (NICU) nurses would share a lot about why breastfeeding is good. They were like, ‘Don't be demotivated if he doesn't latch. You keep trying. You keep trying’…They did stand by and assist as much as they could.” Mother (Formula feeding)  “Different nurses, they have different techniques. I don't know which to listen to. It was very confusing and it makes me very frustrated because I was new to it.” Mother (Formula feeding)  “I was quite annoyed because they would come in and then they will ask you ‘Oh, when was the last time you fed? How long do you feed her for?’…they keep asking me…it can be quite pressurizing.” Mother (Breastfeeding) |
| **Issues with current information** | | | |
| Framing and information given | Too focused on ‘breast is best’ | “Definitely there's this peer pressure, stigmatization, in society for breastfeeding especially in Singapore.” Doctor (Women’s health)  “We need to have a better message... It is not so simplistic as just saying breastfeeding is the best.” Mother (Breastfeeding)  “I think what the system should do is that it should let ladies know their options and let them make choices about it and empower them in respect of their choices. Now we have a system that doesn't tell you what the options are. It's very top-down.” Mother (Breastfeeding) |
| More practical focus needed | “…you can read about it, you can do all the research online, whatever, but it actually comes down to actual doing the thing itself…the whole thing is maybe quite different from what you read.” Doctor (Women’s health)  “I think equal emphasis should be given to those who cannot latch on for whatever reason whether it's a baby problem or mommy problem. They should be supported to bottle feed.” Doctor (Women’s health)  “Singapore is pretty much like, ‘Oh, you breastfeed, but we might not really give you the tools, the support to actually achieve it.’ It's not a surprise to me that most women actually stop.” Mother (Breastfeeding)  “…they keep showing you the video of how good breastfeeding is, but they didn't really teach you how to do it.” Mother (Formula feeding) |
| Sets unrealistic expectations | “So when it comes to breastfeeding, they also think that it will just happen because the media actually portrays breastfeeding as sitting on a rocking chair in a beautiful nursery and then you latch your baby. But in fact, breastfeeding is just crazy, the first month especially.” Lactation Consultant  “…some people say breastfeeding is very natural. Yes, it's very natural, but it's really hard... I think you have to let people know that a breastfeeding is not a walk in a garden.” Mother (Breastfeeding) |
| Mental health impact | Failure to breastfeed creates distress | “If you do not succeed, there are a lot of women who put pressure on themselves and they feel like they’ve failed their babies and they feel guilty... That's why it's a bit of a fine line.” Doctor (Women’s health)  “I think sometimes the promotion of breastfeeding being the ideal way can be really stressful for first-time mums.” Mother (Breastfeeding)  “I think it's more of beyond breastfeeding and formula milk, it is also how to help mothers overcome the anxiety and depression if breastfeeding fails.” Mother (Formula feeding)  “It makes me feel very inferior when I read some of the posts. Some of the people mentioned how many mls they do pump up at a certain point of time, then I couldn't.” Mother (Formula feeding)  “that (not being able to latch) combined with maybe hormones and combined with this expectation in my mind that is not met, so it gives some sort of a huge guilt feeling… I think expectation versus reality.” Mother (Formula feeding)  “I did struggle as a mom, how come I cannot meet the demands of the baby?” Mother (Breastfeeding)  “I was really quite depressed in the first few weeks because the supply was honestly really low… I felt that all the rest of my friends are feeding their babies with breastmilk, what if my baby didn't to get the full (benefits of) breast milk, is she going to be OK?” Mother (Formula feeding) |
| Mental health is complex | “I think in the quest to be a perfect mom, it's not just the breastfeeding that make them depressed.” Pediatrician  “The new babies, it is not just breastfeeding, is a lot of other things, baby care, when the baby sleep, when the baby cries, she gets painful stitches and all... It's not so simple.” Pediatrician  “It's all to do with the misinformation. You do not know how to adjust to parenting. It is not breastfeeding’s fault, it's the adjustment to having a totally helpless human being that you have to take care of. It's the overall picture.” Lactation Consultant |
| Reactance to avoid mental distress | “I find that people are very worried about how the stress can lead to postnatal depression. So even before baby is born, they set out this barrier and tell themselves, ‘oh, it's OK just as long as I feed my baby’, which technically is positive, but it's also giving an easier way out rather than being an encouragement to keep trying.” Mother (Breastfeeding)  “…for her second one she said that she didn't want to breastfeed at all not even from day one because she had depression from the first one.” Mother (Formula feeding) |
| Need more balanced message | “You don't want to pressurize them such that it affects their mental health too much, but you also don't want to say, ‘Okay, let's just give up,’ because if we could just help you properly, then you could succeed.” Doctor (Women’s health)  “Actually, you don't have to be the best mom, you just have to be a good mom, a good enough mom. I would say we don't have a society, a breastfeeding campaign whereby we're strongly messaging that.” Pediatrician  “I feel that when people are less stressed about having to do one way, it might actually have a more positive impact rather than enforcing it from a negative way, like ‘infant formula is bad.’” Mother (Formula feeding) |
| Availability, format and organization | Local official resources are not easily found | “I can't speak for others, but my impression is that it's not very much information.” Doctor (Women’s health)  “You can see that what is available to the mothers is a lot of information out there, but at the same time, a lot of rubbish... She has to do her own research.” Lactation Consultant  “I mean you can Google, but if you really want a proper website, you know, a legit health care web site from Singapore government, we don't have that.” Mother (Breastfeeding) |
| Mixed views on peer support | “If there is no vigilant eyes, there is no expertise in this, then anyone can say anything.” General Practitioner  “…one person's medicine may not be a correct medicine for another mom. I think it should more be based on evidence.” Lactation Consultant  “Thankfully with the support group from the mommies and from the Facebook, it helps to validate whatever I'm going through.” Mother (Formula feeding) |
| Need to shift to online format | “Most of us are still relying on the traditional modalities of delivery, meaning brochures, classes. We know in today's day and age most people don't really read brochures, most people don't really go for physical classes... There needs to be a one-stop kind of a mobile application that allows the freedom to our patients to access this information as and when they like it.” Doctor (Women’s health) |
